# Supplementary material
Source: publisher figshare collection journal article supplement (https://acs.figshare.com/ndownloader/files/7895854)
Supplement: Supplementary file 1 [file 7895854]

 
data_cdwtd9 
 
_audit_creation_method            SHELXL-97 
_chemical_name_systematic 
; 
 ? 
; 
_chemical_name_common             ? 
_chemical_melting_point           ? 
_chemical_formula_moiety          ? 
_chemical_formula_sum 
 'C11 H13 N O' 
_chemical_formula_weight          175.22 
 
loop_ 
 _atom_type_symbol 
 _atom_type_description 
 _atom_type_scat_dispersion_real 
 _atom_type_scat_dispersion_imag 
 _atom_type_scat_source 
 'C'  'C'   0.0033   0.0016 
 'International Tables Vol C Tables 4.2.6.8 and 6.1.1.4' 
 'H'  'H'   0.0000   0.0000 
 'International Tables Vol C Tables 4.2.6.8 and 6.1.1.4' 
 'N'  'N'   0.0061   0.0033 
 'International Tables Vol C Tables 4.2.6.8 and 6.1.1.4' 
 'O'  'O'   0.0106   0.0060 
 'International Tables Vol C Tables 4.2.6.8 and 6.1.1.4' 
 
_symmetry_cell_setting            ? 
_symmetry_space_group_name_H-M    ? 
 
loop_ 
 _symmetry_equiv_pos_as_xyz 
 'x, y, z' 
 '-x, y, -z+1/2' 
 'x+1/2, y+1/2, z' 
 '-x+1/2, y+1/2, -z+1/2' 
 '-x, -y, -z' 
 'x, -y, z-1/2' 
 '-x+1/2, -y+1/2, -z' 
 'x+1/2, -y+1/2, z-1/2' 
 
_cell_length_a                    20.072(3) 
_cell_length_b                    7.6779(12) 
_cell_length_c                    15.750(4) 
_cell_angle_alpha                 90.00 
_cell_angle_beta                  126.575(2) 
_cell_angle_gamma                 90.00 
_cell_volume                      1949.3(6) 
_cell_formula_units_Z             8 
_cell_measurement_temperature     298(2) 
_cell_measurement_reflns_used     ? 
_cell_measurement_theta_min       ? 
_cell_measurement_theta_max       ? 
 
_exptl_crystal_description        ? 
_exptl_crystal_colour             ? 
_exptl_crystal_size_max           0.49 
_exptl_crystal_size_mid           0.31 
_exptl_crystal_size_min           0.31 
_exptl_crystal_density_meas       ? 
_exptl_crystal_density_diffrn     1.194 
_exptl_crystal_density_method     'not measured' 
_exptl_crystal_F_000              752 
_exptl_absorpt_coefficient_mu     0.077 
_exptl_absorpt_correction_type    ? 
_exptl_absorpt_correction_T_min   0.9634 
_exptl_absorpt_correction_T_max   0.9766 
_exptl_absorpt_process_details    ? 
 
_exptl_special_details 
; 
 ? 
; 
 
_diffrn_ambient_temperature       298(2) 
_diffrn_radiation_wavelength      0.71073 
_diffrn_radiation_type            MoK\a 
_diffrn_radiation_source          'fine-focus sealed tube' 
_diffrn_radiation_monochromator   graphite 
_diffrn_measurement_device_type   ? 
_diffrn_measurement_method        ? 
_diffrn_detector_area_resol_mean  ? 
_diffrn_reflns_number             8921 
_diffrn_reflns_av_R_equivalents   0.0207 
_diffrn_reflns_av_sigmaI/netI     0.0213 
_diffrn_reflns_limit_h_min        -26 
_diffrn_reflns_limit_h_max        25 
_diffrn_reflns_limit_k_min        -10 
_diffrn_reflns_limit_k_max        9 
_diffrn_reflns_limit_l_min        -20 
_diffrn_reflns_limit_l_max        20 
_diffrn_reflns_theta_min          2.53 
_diffrn_reflns_theta_max          27.77 
_reflns_number_total              2260 
_reflns_number_gt                 1713 
_reflns_threshold_expression      >2sigma(I) 
 
_computing_data_collection        ? 
_computing_cell_refinement        ? 
_computing_data_reduction         ? 
_computing_structure_solution     'SHELXS-97 (Sheldrick, 2008)' 
_computing_structure_refinement   'SHELXL-97 (Sheldrick, 2008)' 
_computing_molecular_graphics     ? 
_computing_publication_material   ? 
 
_refine_special_details 
; 
 Refinement of F^2^ against ALL reflections.  The weighted R-factor wR and 
 goodness of fit S are based on F^2^, conventional R-factors R are based 
 on F, with F set to zero for negative F^2^. The threshold expression of 
 F^2^ > 2sigma(F^2^) is used only for calculating R-factors(gt) etc. and is 
 not relevant to the choice of reflections for refinement.  R-factors based 
 on F^2^ are statistically about twice as large as those based on F, and R- 
 factors based on ALL data will be even larger. 
; 
 
_refine_ls_structure_factor_coef  Fsqd  
_refine_ls_matrix_type            full 
_refine_ls_weighting_scheme       calc  
_refine_ls_weighting_details 
 'calc w=1/[\s^2^(Fo^2^)+(0.1000P)^2^+0.3100P] where P=(Fo^2^+2Fc^2^)/3' 
_atom_sites_solution_primary      direct 
_atom_sites_solution_secondary    difmap 
_atom_sites_solution_hydrogens    geom 
_refine_ls_hydrogen_treatment     mixed 
_refine_ls_extinction_method      none 
_refine_ls_extinction_coef        ? 
_refine_ls_number_reflns          2260 
_refine_ls_number_parameters      119 
_refine_ls_number_restraints      0 
_refine_ls_R_factor_all           0.0609 
_refine_ls_R_factor_gt            0.0445 
_refine_ls_wR_factor_ref          0.1532 
_refine_ls_wR_factor_gt           0.1357 
_refine_ls_goodness_of_fit_ref    0.982 
_refine_ls_restrained_S_all       0.982 
_refine_ls_shift/su_max           0.000 
_refine_ls_shift/su_mean          0.000 
 
loop_ 
 _atom_site_label 
 _atom_site_type_symbol 
 _atom_site_fract_x 
 _atom_site_fract_y 
 _atom_site_fract_z 
 _atom_site_U_iso_or_equiv 
 _atom_site_adp_type 
 _atom_site_occupancy 
 _atom_site_symmetry_multiplicity 
 _atom_site_calc_flag 
 _atom_site_refinement_flags 
 _atom_site_disorder_assembly 
 _atom_site_disorder_group 
O1 O 0.16619(8) 0.76747(13) 0.51340(10) 0.0690(4) Uani 1 1 d . . . 
N1 N 0.18210(7) 0.56919(14) 0.42205(9) 0.0492(3) Uani 1 1 d . . . 
H13 H 0.2255 0.6243 0.4380 0.059 Uiso 1 1 calc R . . 
C1 C 0.05996(9) 0.55233(19) 0.41918(11) 0.0525(4) Uani 1 1 d . . . 
H1 H 0.0276 0.5317 0.3437 0.063 Uiso 1 1 calc R . . 
H9 H 0.0286 0.6312 0.4313 0.063 Uiso 1 1 calc R . . 
C2 C 0.07144(9) 0.3808(2) 0.47448(11) 0.0514(4) Uani 1 1 d . . . 
H8 H 0.0191 0.3185 0.4354 0.062 Uiso 1 1 calc R . . 
H7 H 0.0869 0.4045 0.5446 0.062 Uiso 1 1 calc R . . 
C3 C 0.13749(9) 0.26607(18) 0.48393(11) 0.0497(4) Uani 1 1 d . . . 
H6 H 0.1915 0.3046 0.5445 0.060 Uiso 1 1 calc R . . 
H5 H 0.1297 0.1475 0.4977 0.060 Uiso 1 1 calc R . . 
C4 C 0.13748(7) 0.26578(16) 0.38874(10) 0.0414(3) Uani 1 1 d . . . 
C5 C 0.11979(9) 0.11735(19) 0.32893(12) 0.0544(4) Uani 1 1 d . . . 
H10 H 0.1022 0.0182 0.3443 0.065 Uiso 1 1 calc R . . 
C6 C 0.12726(10) 0.1107(2) 0.24689(12) 0.0595(4) Uani 1 1 d . . . 
C7 C 0.10764(16) -0.0544(3) 0.1840(2) 0.1046(8) Uani 1 1 d . . . 
H11 H 0.0699 -0.0286 0.1099 0.157 Uiso 1 1 calc R . . 
H12 H 0.0826 -0.1371 0.2028 0.157 Uiso 1 1 calc R . . 
H2 H 0.1579 -0.1023 0.1993 0.157 Uiso 1 1 calc R . . 
C8 C 0.14016(9) 0.63791(18) 0.45580(11) 0.0484(4) Uani 1 1 d . . . 
C9 C 0.16133(7) 0.41433(16) 0.36257(9) 0.0401(3) Uani 1 1 d . . . 
C10 C 0.16954(9) 0.40964(19) 0.28113(10) 0.0485(3) Uani 1 1 d . . . 
H3 H 0.1859 0.5091 0.2643 0.058 Uiso 1 1 calc R . . 
C11 C 0.15346(9) 0.2579(2) 0.22502(11) 0.0560(4) Uani 1 1 d . . . 
H4 H 0.1604 0.2552 0.1717 0.067 Uiso 1 1 calc R . . 
 
loop_ 
 _atom_site_aniso_label 
 _atom_site_aniso_U_11 
 _atom_site_aniso_U_22 
 _atom_site_aniso_U_33 
 _atom_site_aniso_U_23 
 _atom_site_aniso_U_13 
 _atom_site_aniso_U_12 
O1 0.0998(9) 0.0539(6) 0.0951(8) -0.0221(5) 0.0807(8) -0.0177(6) 
N1 0.0589(7) 0.0473(7) 0.0592(7) -0.0092(5) 0.0448(6) -0.0085(5) 
C1 0.0477(8) 0.0632(9) 0.0534(7) 0.0000(6) 0.0337(7) 0.0080(6) 
C2 0.0483(7) 0.0637(9) 0.0534(8) -0.0054(6) 0.0364(7) -0.0086(6) 
C3 0.0547(8) 0.0544(8) 0.0481(7) 0.0069(6) 0.0350(7) 0.0009(6) 
C4 0.0385(6) 0.0457(7) 0.0414(6) 0.0006(5) 0.0245(6) 0.0019(5) 
C5 0.0553(8) 0.0480(8) 0.0639(9) -0.0064(6) 0.0376(7) -0.0052(6) 
C6 0.0584(9) 0.0622(9) 0.0555(8) -0.0166(7) 0.0327(7) -0.0013(7) 
C7 0.128(2) 0.0887(14) 0.1146(17) -0.0529(13) 0.0813(16) -0.0221(13) 
C8 0.0630(8) 0.0448(7) 0.0536(7) 0.0000(6) 0.0435(7) 0.0012(6) 
C9 0.0402(6) 0.0442(7) 0.0381(6) -0.0006(5) 0.0246(5) 0.0027(5) 
C10 0.0550(8) 0.0534(8) 0.0462(7) 0.0052(6) 0.0351(6) 0.0072(6) 
C11 0.0579(8) 0.0735(10) 0.0414(7) -0.0036(6) 0.0322(7) 0.0098(7) 
 
_geom_special_details 
; 
 All esds (except the esd in the dihedral angle between two l.s. planes) 
 are estimated using the full covariance matrix.  The cell esds are taken 
 into account individually in the estimation of esds in distances, angles 
 and torsion angles; correlations between esds in cell parameters are only 
 used when they are defined by crystal symmetry.  An approximate (isotropic) 
 treatment of cell esds is used for estimating esds involving l.s. planes. 
; 
 
loop_ 
 _geom_bond_atom_site_label_1 
 _geom_bond_atom_site_label_2 
 _geom_bond_distance 
 _geom_bond_site_symmetry_2 
 _geom_bond_publ_flag 
O1 C8 1.2331(16) . ? 
N1 C8 1.3428(16) . ? 
N1 C9 1.4141(16) . ? 
N1 H13 0.8600 . ? 
C1 C8 1.500(2) . ? 
C1 C2 1.519(2) . ? 
C1 H1 0.9700 . ? 
C1 H9 0.9700 . ? 
C2 C3 1.523(2) . ? 
C2 H8 0.9700 . ? 
C2 H7 0.9700 . ? 
C3 C4 1.4993(18) . ? 
C3 H6 0.9700 . ? 
C3 H5 0.9700 . ? 
C4 C5 1.3833(18) . ? 
C4 C9 1.3910(17) . ? 
C5 C6 1.388(2) . ? 
C5 H10 0.9300 . ? 
C6 C11 1.375(2) . ? 
C6 C7 1.509(2) . ? 
C7 H11 0.9600 . ? 
C7 H12 0.9600 . ? 
C7 H2 0.9600 . ? 
C9 C10 1.3876(17) . ? 
C10 C11 1.3792(19) . ? 
C10 H3 0.9300 . ? 
C11 H4 0.9300 . ? 
 
loop_ 
 _geom_angle_atom_site_label_1 
 _geom_angle_atom_site_label_2 
 _geom_angle_atom_site_label_3 
 _geom_angle 
 _geom_angle_site_symmetry_1 
 _geom_angle_site_symmetry_3 
 _geom_angle_publ_flag 
C8 N1 C9 125.86(11) . . ? 
C8 N1 H13 117.1 . . ? 
C9 N1 H13 117.1 . . ? 
C8 C1 C2 113.46(11) . . ? 
C8 C1 H1 108.9 . . ? 
C2 C1 H1 108.9 . . ? 
C8 C1 H9 108.9 . . ? 
C2 C1 H9 108.9 . . ? 
H1 C1 H9 107.7 . . ? 
C1 C2 C3 112.54(10) . . ? 
C1 C2 H8 109.1 . . ? 
C3 C2 H8 109.1 . . ? 
C1 C2 H7 109.1 . . ? 
C3 C2 H7 109.1 . . ? 
H8 C2 H7 107.8 . . ? 
C4 C3 C2 114.94(11) . . ? 
C4 C3 H6 108.5 . . ? 
C2 C3 H6 108.5 . . ? 
C4 C3 H5 108.5 . . ? 
C2 C3 H5 108.5 . . ? 
H6 C3 H5 107.5 . . ? 
C5 C4 C9 117.89(12) . . ? 
C5 C4 C3 121.96(12) . . ? 
C9 C4 C3 120.00(11) . . ? 
C4 C5 C6 122.57(13) . . ? 
C4 C5 H10 118.7 . . ? 
C6 C5 H10 118.7 . . ? 
C11 C6 C5 118.20(13) . . ? 
C11 C6 C7 121.03(16) . . ? 
C5 C6 C7 120.76(16) . . ? 
C6 C7 H11 109.5 . . ? 
C6 C7 H12 109.5 . . ? 
H11 C7 H12 109.5 . . ? 
C6 C7 H2 109.5 . . ? 
H11 C7 H2 109.5 . . ? 
H12 C7 H2 109.5 . . ? 
O1 C8 N1 121.15(13) . . ? 
O1 C8 C1 121.58(12) . . ? 
N1 C8 C1 117.26(12) . . ? 
C10 C9 C4 120.26(12) . . ? 
C10 C9 N1 118.92(11) . . ? 
C4 C9 N1 120.72(10) . . ? 
C11 C10 C9 120.20(13) . . ? 
C11 C10 H3 119.9 . . ? 
C9 C10 H3 119.9 . . ? 
C6 C11 C10 120.83(13) . . ? 
C6 C11 H4 119.6 . . ? 
C10 C11 H4 119.6 . . ? 
 
loop_ 
 _geom_torsion_atom_site_label_1 
 _geom_torsion_atom_site_label_2 
 _geom_torsion_atom_site_label_3 
 _geom_torsion_atom_site_label_4 
 _geom_torsion 
 _geom_torsion_site_symmetry_1 
 _geom_torsion_site_symmetry_2 
 _geom_torsion_site_symmetry_3 
 _geom_torsion_site_symmetry_4 
 _geom_torsion_publ_flag 
C8 C1 C2 C3 -44.06(16) . . . . ? 
C1 C2 C3 C4 -39.81(16) . . . . ? 
C2 C3 C4 C5 -115.52(14) . . . . ? 
C2 C3 C4 C9 69.04(16) . . . . ? 
C9 C4 C5 C6 1.9(2) . . . . ? 
C3 C4 C5 C6 -173.66(14) . . . . ? 
C4 C5 C6 C11 0.1(2) . . . . ? 
C4 C5 C6 C7 179.73(16) . . . . ? 
C9 N1 C8 O1 175.05(13) . . . . ? 
C9 N1 C8 C1 -5.9(2) . . . . ? 
C2 C1 C8 O1 -106.06(16) . . . . ? 
C2 C1 C8 N1 74.88(16) . . . . ? 
C5 C4 C9 C10 -2.16(18) . . . . ? 
C3 C4 C9 C10 173.47(12) . . . . ? 
C5 C4 C9 N1 -178.55(11) . . . . ? 
C3 C4 C9 N1 -2.93(18) . . . . ? 
C8 N1 C9 C10 139.65(14) . . . . ? 
C8 N1 C9 C4 -43.91(18) . . . . ? 
C4 C9 C10 C11 0.51(19) . . . . ? 
N1 C9 C10 C11 176.97(12) . . . . ? 
C5 C6 C11 C10 -1.8(2) . . . . ? 
C7 C6 C11 C10 178.53(15) . . . . ? 
C9 C10 C11 C6 1.6(2) . . . . ? 
 
_diffrn_measured_fraction_theta_max    0.985 
_diffrn_reflns_theta_full              27.77 
_diffrn_measured_fraction_theta_full   0.985 
_refine_diff_density_max    0.218 
_refine_diff_density_min   -0.170 
_refine_diff_density_rms    0.038 
